# Supplementary material for: Genetic Alternatives for Experimental Adaptation to Colistin in Three Pseudomonas aeruginosa Lineages
Source: MDPI journal article supplement (doi:10.3390/antibiotics13050452), 2024-05-15
Supplement: s1 [file s1]

**Table S3.** Sequence alterations in general metabolism genes not directly related to colistin resistance among three experimental lineages during adaptation to increasing colistin concentrations.

| Gene                                 | Sequence alteration               |                           |
|--------------------------------------|-----------------------------------|---------------------------|
|                                      | DNA                               | AA                        |
| <b><i>Pa_ATCC</i> lineage</b>        |                                   |                           |
| <i>parR</i>                          | G466→A, missense                  | E156K                     |
| <i>nuoM</i>                          | del-TTC-427-429                   | del-F143                  |
| <i>folK</i>                          | T440→C , missense                 | L147P                     |
| <i>dnaK</i>                          | A517→G, missense                  | T173A                     |
| <i>anr</i>                           | del-GCT-465-467                   | del-L156                  |
| <i>sdhA</i>                          | A854→G , missense                 | D285G                     |
| <i>ppiD</i>                          | ins-G-1287                        | G429fs, incorrect protein |
| <i>hscA</i>                          | A384→C, missense                  | E128D                     |
| <i>pilJ</i>                          | del-A-1754                        | S584fs, incorrect protein |
| <i>ppkA</i>                          | A1126→G, missense                 | S376G                     |
| <b><i>Pa_Environment</i> lineage</b> |                                   |                           |
| <i>cysL</i>                          | G746→A, missense                  | R249H                     |
| <i>prs</i>                           | T143→C, missense                  | V48A                      |
| <i>brnQ</i>                          | del-12bp-566-577                  | del-F189-G192             |
| <i>speE</i>                          | T836→C, missense                  | V279A                     |
| <i>fha1</i>                          | ins-ACAGCC-849                    | ins-Q284-P285             |
| <i>hp/PA2072</i>                     | del-13bp-908-920                  | E302fs, incorrect protein |
| <i>hp/PA2117</i>                     | G326→A, missense                  | R109H                     |
| <i>tetC</i>                          | G332→A, missense                  | R111H                     |
| <i>oprH</i>                          | ins-G-192                         | G64fs, incorrect protein  |
| <i>pykF</i>                          | G676→A, missense                  | A226T                     |
| <b><i>Pa_MDR</i> lineage</b>         |                                   |                           |
| <i>lasR</i>                          | G502→T, nonsense                  | E168*, incomplete protein |
| <i>capD</i>                          | del-T-360                         | A119fs, incorrect protein |
| <i>wecA</i>                          | C313→T, missense                  | H105Y                     |
| <i>mexB</i>                          | C2795→T , missense                | T932M                     |
| <i>spaQ</i>                          | T122→C , missense                 | L41P                      |
| <i>invA</i>                          | ins-G-1726                        | G575fs, incorrect protein |
| <i>pcpR</i>                          | G430→T , missense                 | A144S                     |
| <i>davD</i>                          | TGA1450-1452→CTC, stop codon loss | incorrect protein         |
| <i>hp/PA0285</i>                     | G1516→A, missense                 | E506K                     |
| <i>rpoB</i>                          | del-24bp-850-873                  | del-K284-E291             |
| <i>rpoA</i>                          | ins-CTGGTC-604                    | ins-L202-V203             |
| <i>morA</i>                          | A3121→C, missense                 | T1041P                    |
| <i>exsD</i>                          | G64→A, missense                   | V22M                      |
| <i>degS</i>                          | T692→A, missense                  | L231Q                     |
| Note. AA, amino acid                 |                                   |                           |
