# Supplementary material for: Genetic Alternatives for Experimental Adaptation to Colistin in Three Pseudomonas aeruginosa Lineages
Source: MDPI journal article supplement (doi:10.3390/antibiotics13050452), 2024-05-15
Supplement: s1 [file s1]

**Table S1.** Individual core gene alterations in the *Pa\_ATCC* lineage, by colistin concentration band and time

[illegible]

| Isolate |          | Day | Colistin    |                    | <i>phoQ</i> | <i>phoP</i> | <i>lpxL/PA0011</i> | <i>parR</i> | <i>nuoM</i> | <i>folK</i> | <i>dnaK</i> | <i>anr</i> | <i>sdhA</i> | <i>ppiD</i> | <i>hscA</i> | <i>pilJ</i> | <i>ppkA</i> |
|---------|----------|-----|-------------|--------------------|-------------|-------------|--------------------|-------------|-------------|-------------|-------------|------------|-------------|-------------|-------------|-------------|-------------|
| ID      | Topology |     | Plate, mg/L | MIC, fold increase |             |             |                    |             |             |             |             |            |             |             |             |             |             |
| 62      | H26      | 15  | 4           | 8                  |             |             |                    |             |             |             |             |            |             |             |             |             |             |
| 63      | F24      | 15  | 4           | 4                  |             |             |                    |             |             |             |             |            |             |             |             |             |             |
| 64      | D22      | 15  | 4           | 4                  |             |             |                    |             |             |             |             |            |             |             |             |             |             |
| 65      | B23      | 15  | 4           | 4                  |             |             |                    |             |             |             |             |            |             |             |             |             |             |
| 71      | H27      | 17  | 4           | 4                  |             |             |                    |             |             |             |             |            |             |             |             |             |             |
| 72      | E24      | 17  | 4           | 4                  |             |             |                    |             |             |             |             |            |             |             |             |             |             |
| 73      | A25      | 17  | 4           | 4                  |             |             |                    |             |             |             |             |            |             |             |             |             |             |
| 82      | H29      | 21  | 4           | 4                  |             |             |                    |             |             |             |             |            |             |             |             |             |             |
| 84      | C27      | 21  | 4           | 4                  |             |             |                    |             |             |             |             |            |             |             |             |             |             |
| 85      | A27      | 21  | 4           | 4                  |             |             |                    |             |             |             |             |            |             |             |             |             |             |
| 94      | H32      | 27  | 40          | 4                  |             |             |                    |             |             |             |             |            |             |             |             |             |             |
| 95      | E31      | 27  | 40          | 4                  |             |             |                    |             |             |             |             |            |             |             |             |             |             |
| 96      | A31      | 27  | 40          | 8                  |             |             |                    |             |             |             |             |            |             |             |             |             |             |
| 99      | F35      | 33  | 40          | 4                  |             |             |                    |             |             |             |             |            |             |             |             |             |             |
| 101     | A33      | 33  | 40          | 4                  |             |             |                    |             |             |             |             |            |             |             |             |             |             |
| 104     | H39      | 42  | 40          | 4                  |             |             |                    |             |             |             |             |            |             |             |             |             |             |
| 105     | F39      | 42  | 40          | 4                  |             |             |                    |             |             |             |             |            |             |             |             |             |             |
| 106     | C38      | 42  | 40          | 8                  |             |             |                    |             |             |             |             |            |             |             |             |             |             |
| 107     | A38      | 42  | 40          | 4                  |             |             |                    |             |             |             |             |            |             |             |             |             |             |
| 108     | H40      | 47  | 40          | 4                  |             |             |                    |             |             |             |             |            |             |             |             |             |             |
| 109     | D40      | 47  | 40          | 4                  |             |             |                    |             |             |             |             |            |             |             |             |             |             |
| 110     | B40      | 47  | 40          | 4                  |             |             |                    |             |             |             |             |            |             |             |             |             |             |
| 113     | H50      | 60  | 400         | 4                  |             |             |                    |             |             |             |             |            |             |             |             |             |             |
| 114     | E49      | 60  | 400         | 4                  |             |             |                    |             |             |             |             |            |             |             |             |             |             |
| 116     | A48      | 61  | 400         | 4                  |             |             |                    |             |             |             |             |            |             |             |             |             |             |

Note. Fifty-five isolates of the Pa\_ATCC lineage were collected from the experimental plate. Details are provided in Table 2 of the main text. Mutation variants are shown in the Supplementary Table S3.
