# Supplementary material for: Genetic Alternatives for Experimental Adaptation to Colistin in Three Pseudomonas aeruginosa Lineages
Source: MDPI journal article supplement (doi:10.3390/antibiotics13050452), 2024-05-15
Supplement: s1 [file s1]

**Table S2.** Individual core gene alterations in the *Pa* MDR lineage, by colistin concentration band and time

[illegible]



[illegible]
