# Supplementary material for: Genetic Alternatives for Experimental Adaptation to Colistin in Three Pseudomonas aeruginosa Lineages
Source: Antibiotics (Basel). 2024 May 15;13(5):452. doi: 10.3390/antibiotics13050452 (PMC11117860; doi:10.3390/antibiotics13050452)
Supplement: Supplementary file 1 [file antibiotics-13-00452-s001.zip]

Archive with 5 entries (5 files):
- Supplementary Figures S1 and S2.pdf
- Supplementary Movie S1.mp4
- Supplementary Table S1.pdf
- Supplementary Table S2.pdf
- Supplementary Table S3.pdf
